# Supplementary material
Source: publisher figshare collection journal article supplement (https://tandf.figshare.com/articles/dataset/_/3853491)
Supplement: Supplementary file 2 [file 2]

Archive with 2 entries (2 files):
- tost_a_1216903_sm4178.pdf
- tost_a_1216903_sm2469.pdf
