# Supplementary material
Source: publisher figshare collection journal article supplement (https://tandf.figshare.com/articles/dataset/_/3853491)
Supplement: Supplementary file 2 [file 2 › tost_a_1216903_sm4178.pdf]

## **Supplementary Information**

### **The influence of food abundance, food dispersion and habitat structure on territory selection and size of an Afrotropical terrestrial insectivore**

William D Newmark and Thomas R Stanley

Ostrich 2016, 87(3): 199–207. DOI: <http://dx.doi.org/10.2989/00306525.2016.1216903>

### **Estimation of mean annual population size of the Usambara Thrush in the study area**

#### **Methods**

In order to assess the proportion of the total population in the study area that was radio-tracked, because the number of birds radio-tracked was relatively small ( $N = 9$ ), we used long-term capture recapture data for the Usambara Thrush in our study area to estimate mean population size (Newmark 2006; Korfanta et al. 2012). The Usambara Thrush was surveyed annually within the study area at three sites over a 27-year period (1987–2013) for three days per year per site using mist-nets. The habitat structure of the three sites differed and was representative of the three major habitat types (primary forest, slightly disturbed forest, and moderately disturbed forest) that occurred in our study area. Additional details regarding survey methods and protocols are presented in Newmark (2006) and Korfanta et al. (2012).

We obtained point and error estimates of population size for each year from 1987 through 2013 using the Huggins closed population models (Huggins 1989, 1991) under a robust design framework (Kendall et al. 1995, 1997) in Program MARK (White and Burnham 1999). We used  $AIC_c$  for model selection (Burnham and Anderson 2002), and averaged annual population size estimates to obtain

mean population size; we computed the corresponding error term using the delta method (Seber 1982).

## Results

Based on  $AIC_c$  model selection, the most parsimonious model for our data was one in which capture probability ( $p$ ) and recapture probability ( $c$ ) were constrained to be constant and equal to each other across all years. Under that model we found the mean population size of the Usambara Thrush between 1987 and 2013 in the study area to be 17 ( $\pm 1$ ) indicating that approximately 53% of the total Usambara Thrush population in the study area was radio-tracked.

## References

- Burnham KP, Anderson DR. 2002. *Model selection and multimodel inference: a practical information-theoretic approach* (2nd edn). New York: Springer-Verlag.
- Huggins RM. 1989. On the statistical analysis of capture–recapture experiments. *Biometrika* 76: 133–140.
- Huggins RM. 1991. Some practical aspects of a conditional likelihood approach to capture experiments. *Biometrics* 47: 725–732.
- Kendall WL, Pollock KH, Brownie C. 1995. A likelihood-based approach to capture-recapture estimation of demographic parameters under the robust design. *Biometrics* 51: 293–308.
- Kendall WL, Nichols JD, Hines JE. 1997. Estimating temporary emigration using capture–recapture data with Pollock’s robust design. *Ecology* 78: 563–578.

- Korfanta N, Newmark WD, Kauffman MJ. 2012. Long-term demographic consequences of habitat fragmentation to a tropical understory bird community. *Ecology* 93: 2548–2559.
- Newmark WD. 2006. A 16-year study of forest disturbance and understory bird community structure and composition in Tanzania. *Conservation Biology* 20: 122–134.
- Seber GAF. 1982. *The estimation of animal abundance and related parameters* (2nd edn). New York: Macmillan.
- White GC, Burnham KP. 1999. Program MARK: survival estimation from populations of marked animals. *Bird Study* 46: 120–138.
